# Supplementary material for: Investigating the role of dystrophin isoform deficiency in motor function in Duchenne muscular dystrophy
Source: PubMed Central journal article supplement (PMC8977977; doi:10.1002/jcsm.12914), 2022-01-26
Supplement: JCSM-13-1360-s002.pdf [file JCSM-13-1360-s002.pdf]

**Investigating the Role of Dystrophin Isoform Deficiency in Motor Function in Duchenne Muscular Dystrophy**

Mary Chesshyre<sup>1,3</sup>, Deborah Ridout<sup>2,3</sup>, Yasumasa Hashimoto<sup>4</sup>, Yoko Ookubo<sup>4</sup>, Silvia Torelli<sup>1</sup>, Kate Maresh<sup>1,3</sup>, Valeria Ricotti<sup>1,3</sup>, Lianne Abbott<sup>1,3</sup>, Vandana Ayyar Gupta<sup>1</sup>, Marion Main<sup>1,3</sup>, Giulia Ferrari<sup>5</sup>, Anna Kowala<sup>6</sup>, Yung-Yao Lin<sup>6</sup>, Francesco Saverio Tedesco<sup>1,5,7</sup>, Mariacristina Scoto<sup>1,3</sup>, Giovanni Baranello<sup>1,3</sup>, Adnan Manzur<sup>1,3</sup>, Yoshitsugu Aoki<sup>4</sup> and Francesco Muntoni<sup>1,3</sup>

On behalf of the North Star clinical network

1. Dubowitz Neuromuscular Centre, UCL Great Ormond Street Institute of Child Health, 30 Guilford Street, London, WC1N 1EH, United Kingdom
2. Population, Policy and Practice Research and Teaching Department, UCL Great Ormond Street Institute of Child Health, 30 Guilford Street, London, WC1N 1EH, United Kingdom
3. NIHR Great Ormond Street Hospital Biomedical Research Centre, UCL Great Ormond Street Institute of Child Health, 30 Guilford Street, London, WC1N 1EH, United Kingdom
4. Department of Molecular Therapy, National Institute of Neuroscience, National Center of Neurology and Psychiatry (NCNP), Kodaira, Tokyo 187-8502, Japan
5. Department of Cell and Developmental Biology, University College London, London, WC1E 6DE, United Kingdom
6. Centre for Genomics and Child Health, Blizard Institute, Barts and the London School of Medicine and Dentistry, Queen Mary University of London, 4 Newark Street, London E1 2AT, United Kingdom
7. The Francis Crick Institute, 1 Midland Road, London, NW1 1AT, United Kingdom

Corresponding author

Professor Francesco Muntoni

Dubowitz Neuromuscular Centre

UCL Great Ormond Street Institute of Child Health

30 Guilford Street

London

WC1N 1EH

United Kingdom

[f.muntoni@ucl.ac.uk](mailto:f.muntoni@ucl.ac.uk)

**Journal of Cachexia, Sarcopenia and Muscle – Supplementary material. Table S1, Table S2 and Table S3**

Supplementary material

**Table S1.** Sample type, *DMD* mutation, location and isoform group for samples used in analysis for Fig. 2

| Sample                                  | <i>DMD</i> mutation    | Location | Isoform group |
|-----------------------------------------|------------------------|----------|---------------|
| 1. Control fibroblasts MyoD transfected | N/A                    | Skin     | CTRL          |
| 2. Control fibroblasts MyoD transfected | N/A                    | Skin     | CTRL          |
| 3. CTRL muscle                          | N/A                    | Quad     | CTRL          |
| 4. CTRL muscle                          | N/A                    | Quad     | CTRL          |
| 5. DMD myogenic cells                   | Point mutation exon 12 | Quad     | Group 1       |
| 6. DMD muscle                           | Point mutation exon 32 | Quad     | Group 1       |
| 7. DMD muscle                           | Deletion exons 10-11   | Quad     | Group 1       |
| 8. DMD fibroblasts MyoD transfected     | Deletion exon 52       | Skin     | Group 2       |
| 9. DMD fibroblasts MyoD transfected     | Deletion exon 52       | Skin     | Group 2       |
| 10. DMD muscle                          | Deletion exons 48-54   | Quad     | Group 2       |
| 11. DMD muscle                          | Point mutation exon 52 | Quad     | Group 2       |
| 12. DMD muscle                          | Deletion exon 52       | Quad     | Group 2       |
| 13. DMD myogenic iPSc                   | Point mutation exon 71 | Skin     | Group 3       |
| 14. DMD myogenic iPSc                   | Point mutation exon 68 | Skin     | Group 3       |
| 15. DMD myogenic cells                  | Point mutation exon 70 | Skin     | Group 3       |
| 16. DMD myogenic cells                  | Point mutation exon 73 | Skin     | Group 3       |
| 17. DMD muscle                          | Point mutation exon 67 | EDB      | Group 3       |
| 18. DMD muscle                          | Point mutation exon 70 | Quad     | Group 3       |
| 19. DMD muscle                          | Point mutation exon 70 | Quad     | Group 3       |

**Table S1.** Sample type, *DMD* mutation, location and isoform group for samples used in analysis for Fig. 2. CTRL= control, Quad = quadriceps, EDB = extensor digitorum brevis. Dystrophin isoform grouping is according to *DMD* mutation expected effects on dystrophin isoform expression as follows; Group 1 (Dp427 absent, Dp140/Dp71 present); Group 2 (Dp427/Dp140 absent, Dp71 present); and Group 3 (Dp427/Dp140/Dp71 absent).

**Table S2.** Relationships between dystrophin isoform group and cognition group and between cognition group and peak NSAA scores

| Relationships between dystrophin isoform group and cognition group |                  |                    |                      |
|--------------------------------------------------------------------|------------------|--------------------|----------------------|
| Dystrophin isoform group                                           | Normal cognition | Impaired cognition |                      |
| Group 1 (n, %)                                                     | 43 (68%)         | 20 (32%)           |                      |
| Group 2 (n, %)                                                     | 26 (47%)         | 29 (53%)           |                      |
| Group 3 (n, %)                                                     | 2 (22%)          | 7 (78%)            |                      |
| Age of diagnosis and starting GC stratified by cognition group     |                  |                    |                      |
| Age of diagnosis in years<br>Mean (sd)                             | 3.4 (1.7)        | 3.1 (1.7)          |                      |
| Age of starting GC in years<br>Mean (sd)                           | 5.1 (1.4)        | 5.2 (0.8)          |                      |
| Peak NSAA scores stratified by cognition group                     |                  |                    |                      |
|                                                                    | Normal cognition | Impaired cognition | Both groups combined |
| Mean (sd) peak NSAA score                                          | 27.7 (5.3)       | 25.3 (5.9)         | 26.6 (5.7)           |
| Number in each group                                               | 71               | 56                 | 127                  |

**Table S2.** Relationships between dystrophin isoform group and cognition group and between cognition group and peak NSAA scores, after adjusting for GC regime. GC=glucocorticoid. This table considers the subset of participants (n=127) for whom cognition grouping, GC regimen and peak NSAA scores were available. Dystrophin isoform grouping is according to *DMD* mutation expected effects on dystrophin isoform expression as follows; Group 1 (Dp427 absent, Dp140/Dp71 present); Group 2 (Dp427/Dp140 absent, Dp71 present); and Group 3 (Dp427/Dp140/Dp71 absent).

**Table S3.** Mean peak 4-limb grip strength at 3 months of age, mean force decline rate and mean longest running time in rotarod running test for wild-type (WT), *mdx*, *mdx52* and *DMD-null* mice.

|                 |                    | Mean peak 4-limb grip strength at 3 months of age / Body weight (g/g) | Mean force decline rate (%) | Mean longest running time in rotarod running test (sec) |
|-----------------|--------------------|-----------------------------------------------------------------------|-----------------------------|---------------------------------------------------------|
| WT              |                    | 10.7                                                                  | 85.2                        | 213.9                                                   |
| <i>mdx</i>      |                    | 9.5                                                                   | 65.1                        | 164.7                                                   |
| <i>mdx52</i>    |                    | 8.1                                                                   | 60.4                        | 135.6                                                   |
| <i>DMD-null</i> |                    | 8.0                                                                   | 61.8                        | 128.7                                                   |
| P values        | WT vs <i>mdx</i>   | 0.017                                                                 | 0.014                       | 0.009                                                   |
|                 | WT vs <i>mdx52</i> | <0.0001                                                               | 0.002                       | <0.0001                                                 |

|  |                          |         |       |         |
|--|--------------------------|---------|-------|---------|
|  | <i>WT vs DMD-null</i>    | <0.0001 | 0.003 | <0.0001 |
|  | <i>mdx vs mdx52</i>      | 0.003   | 0.824 | 0.155   |
|  | <i>mdx vs DMD-null</i>   | 0.002   | 0.932 | 0.063   |
|  | <i>mdx52 vs DMD-null</i> | 0.999   | 0.993 | 0.940   |

**Table S3.** Mean peak 4-limb grip strength at 3 months of age, mean force decline rate and mean longest running time in rotarod running test for wild-type (WT), *mdx* (Dp427 absent, Dp140/Dp71 present), *mdx52* (Dp427/Dp140 absent, Dp71 present) and *DMD-null* (lacking all dystrophin isoforms) mice.
